# Supplementary material
Source: PubMed Central journal article supplement (PMC8034288)
Supplement: NIHMS1036176-supplement-Appendix_Tables_1-5.pdf [file NIHMS1036176-supplement-Appendix_Tables_1-5.pdf]

**Appendix Table 1: Predicting Class Polarization in the SD of Weekly Hours Worked**

|                                            | (1)                 | (2)                 | (3)                 |
|--------------------------------------------|---------------------|---------------------|---------------------|
| Lowest wage quartile                       | 11.71***<br>(1.263) | 11.75***<br>(1.263) | 11.35***<br>(1.305) |
| Second wage quartile                       | ref.                | ref.                | ref.                |
| Third wage quartile                        | -2.164*<br>(0.897)  | -2.158*<br>(0.901)  | -2.279*<br>(0.895)  |
| Highest wage quartile                      | 0.759<br>(1.243)    | 0.805<br>(1.237)    | 0.626<br>(1.232)    |
| Less than HS                               | 0.122<br>(1.614)    | 0.447<br>(1.583)    | 0.00453<br>(1.599)  |
| HS, no BA                                  | ref.                | ref.                | ref.                |
| BA or higher                               | 12.04***<br>(0.976) | 12.14***<br>(0.978) | 12.05***<br>(0.979) |
| Unemployment rate                          | 0.210<br>(0.385)    | 0.226<br>(0.381)    | 0.213<br>(0.385)    |
| Unemployment rate × Lowest wage quartile   |                     | 1.892***<br>(0.502) |                     |
| Unemployment rate × Second wage quartile   |                     | ref.                |                     |
| Unemployment rate × Third wage quartile    |                     | 0.307<br>(0.380)    |                     |
| Unemployment rate × Highest wage quartile  |                     | 0.247<br>(0.450)    |                     |
| Unemployment rate × Less than HS           |                     | 1.882*<br>(0.760)   |                     |
| Unemployment rate × HS, no BA              |                     | ref.                |                     |
| Unemployment rate × BA or higher           |                     | -0.897**<br>(0.298) |                     |
| Covered by a union                         | 7.786***<br>(1.629) | 7.719***<br>(1.620) | 6.873***<br>(1.703) |
| Covered by a union × Lowest wage quartile  |                     |                     | -7.250*<br>(3.253)  |
| Covered by a union × Second wage quartile  |                     |                     | ref.                |
| Covered by a union × Third wage quartile   |                     |                     | 0.514<br>(1.841)    |
| Covered by a union × Highest wage quartile |                     |                     | -0.163<br>(2.226)   |
| Covered by a union × Less than HS          |                     |                     | -2.568<br>(3.707)   |
| Covered by a union × HS, no BA             |                     |                     | ref.                |
| Covered by a union × BA or higher          |                     |                     | -0.747<br>(2.434)   |
| Demographic Controls                       | Yes                 | Yes                 | Yes                 |
| Job Controls                               | Yes                 | Yes                 | Yes                 |
| State FE                                   | Yes                 | Yes                 | Yes                 |
| Year and Month FE                          | Yes                 | Yes                 | Yes                 |
| Observations                               | 471208              | 471208              | 471208              |

Standard errors in parentheses

+  $p < .1$ , \*  $p < .05$ , \*\*  $p < .01$ , \*\*\*  $p < .001$

**Appendix Table 2: Comparing the CV of Weekly Hours Worked to Other Measures of Work Hour Volatility**

|                                            | (1)     | (2)      |
|--------------------------------------------|---------|----------|
| Irregular shift set by employer            | 9.170   |          |
|                                            | (10.01) |          |
| Report that usual weekly work hours “vary” |         | 81.38*** |
|                                            |         | (1.265)  |
| Year FE                                    | Yes     | Yes      |
| Observations                               | 2431    | 471205   |

Standard errors in parentheses

+  $p < .1$ , \*  $p < .05$ , \*\*  $p < .01$ , \*\*\*  $p < .001$

**Appendix Table 3: Distribution of the CV of Weekly Hours Worked, by Control Over Start/End Time of Work**

| CV              | Control over Start/End | No Control over Start/End |
|-----------------|------------------------|---------------------------|
| Mean            | .092                   | .077                      |
| 25th percentile | 0                      | 0                         |
| 50th percentile | .065                   | .051                      |
| 75th percentile | .129                   | .109                      |
| 90th percentile | .210                   | .195                      |
| 95th percentile | .282                   | .270                      |

**Appendix Table 4: Regression Results from Models Predicting the CV of Weekly Hours Worked, Full Model Results**

|                                            | (1)                  | (2)                  | (3)                  |
|--------------------------------------------|----------------------|----------------------|----------------------|
| Lowest wage quartile                       | 21.58***<br>(1.661)  | 21.65***<br>(1.664)  | 20.95***<br>(1.685)  |
| Second wage quartile                       | ref.                 | ref.                 | ref.                 |
| Third wage quartile                        | -5.227***<br>(0.853) | -5.212***<br>(0.861) | -5.387***<br>(0.844) |
| Highest wage quartile                      | -1.266<br>(1.157)    | -1.113<br>(1.150)    | -1.638<br>(1.164)    |
| Less than HS                               | 6.149***<br>(1.749)  | 6.650***<br>(1.743)  | 6.129**<br>(1.796)   |
| HS, no BA                                  | ref.                 | ref.                 | ref.                 |
| BA or higher                               | 9.448***<br>(0.828)  | 9.542***<br>(0.835)  | 9.512***<br>(0.837)  |
| Unemployment rate                          | 1.197*<br>(0.484)    | 1.232*<br>(0.477)    | 1.201*<br>(0.484)    |
| Unemployment rate × Lowest wage quartile   |                      | 3.857***<br>(0.574)  |                      |
| Unemployment rate × Second wage quartile   |                      | ref.                 |                      |
| Unemployment rate × Third wage quartile    |                      | -0.191<br>(0.325)    |                      |
| Unemployment rate × Highest wage quartile  |                      | -0.693<br>(0.436)    |                      |
| Unemployment rate × Less than HS           |                      | 2.564*<br>(1.070)    |                      |
| Unemployment rate × HS, no BA              |                      | ref.                 |                      |
| Unemployment rate × BA or higher           |                      | -0.544+<br>(0.320)   |                      |
| Covered by a union                         | 4.708**<br>(1.692)   | 4.561**<br>(1.676)   | 3.019+<br>(1.763)    |
| Covered by a union × Lowest wage quartile  |                      |                      | -12.45***<br>(2.951) |
| Covered by a union × Second wage quartile  |                      |                      | ref.                 |
| Covered by a union × Third wage quartile   |                      |                      | 1.597<br>(2.251)     |
| Covered by a union × Highest wage quartile |                      |                      | 3.275<br>(2.289)     |
| Covered by a union × Less than HS          |                      |                      | 0.797<br>(4.976)     |
| Covered by a union × HS, no BA             |                      |                      | ref.                 |
| Covered by a union × BA or higher          |                      |                      | -0.799<br>(2.261)    |
| Female (ref.: male)                        | -5.594***<br>(1.009) | -5.587***<br>(1.019) | -5.616***<br>(1.011) |
| Black (ref.: White)                        | -1.963<br>(1.604)    | -1.948<br>(1.609)    | -1.877<br>(1.606)    |
| Other race (ref.: White)                   | -4.552**<br>(1.664)  | -4.557**<br>(1.681)  | -4.554**<br>(1.674)  |
| Age <30 (ref.: age 40-49)                  | -0.0167<br>(0.957)   | 0.0103<br>(0.951)    | -0.0689<br>(0.958)   |
| Age 30-39 (ref.: age 40-49)                | -1.164<br>(0.735)    | -1.177<br>(0.725)    | -1.170<br>(0.736)    |
| Age 50+ (ref.: age 40-49)                  | 7.914***<br>(1.034)  | 8.082***<br>(1.047)  | 7.874***<br>(1.032)  |
| Unmarried (ref.: married)                  | 7.697***<br>(0.669)  | 7.583***<br>(0.677)  | 7.675***<br>(0.673)  |

*Continued on next page*

*Continued from previous page*

|                                                                         | (1)                  | (2)                  | (3)                  |
|-------------------------------------------------------------------------|----------------------|----------------------|----------------------|
| Has one HH child (ref.: has no HH children)                             | -4.934***<br>(1.049) | -4.885***<br>(1.032) | -4.940***<br>(1.046) |
| Has two HH children (ref.: has no HH children)                          | -3.717***<br>(0.765) | -3.673***<br>(0.773) | -3.752***<br>(0.765) |
| Has three+ HH children (ref.: has no HH children)                       | 1.143<br>(1.832)     | 1.126<br>(1.827)     | 1.105<br>(1.834)     |
| Foreign-born (ref.: native-born)                                        | -8.980***<br>(1.251) | -9.193***<br>(1.216) | -8.987***<br>(1.260) |
| Occ.: management (ref.: production)                                     | -2.053<br>(1.553)    | -2.265<br>(1.543)    | -1.676<br>(1.567)    |
| Occ.: business operations specialists (ref.: production)                | -13.07***<br>(2.203) | -13.17***<br>(2.202) | -12.76***<br>(2.192) |
| Occ.: financial specialists (ref.: production)                          | -12.53***<br>(1.879) | -12.79***<br>(1.857) | -12.16***<br>(1.920) |
| Occ.: computer and mathematical (ref.: production)                      | -21.89***<br>(2.111) | -21.92***<br>(2.096) | -21.41***<br>(2.112) |
| Occ.: architecture and engineering (ref.: production)                   | -17.26***<br>(2.160) | -17.51***<br>(2.135) | -16.81***<br>(2.146) |
| Occ.: technicians (ref.: production)                                    | 3.659<br>(4.832)     | 3.427<br>(4.821)     | 3.814<br>(4.859)     |
| Occ.: life, physical, and social science (ref.: production)             | -11.14***<br>(2.538) | -11.42***<br>(2.525) | -10.87***<br>(2.521) |
| Occ.: community and social workers (ref.: production)                   | -6.114*<br>(2.753)   | -6.134*<br>(2.740)   | -6.105*<br>(2.736)   |
| Occ.: legal (ref.: production)                                          | -3.326<br>(3.053)    | -3.470<br>(3.037)    | -2.925<br>(3.044)    |
| Occ.: education, training, and library (ref.: production)               | 15.16***<br>(2.782)  | 15.05***<br>(2.766)  | 15.03***<br>(2.756)  |
| Occ.: arts, design, entertainment, sports, and media (ref.: production) | 12.04***<br>(2.548)  | 11.88***<br>(2.564)  | 12.29***<br>(2.562)  |
| Occ.: healthcare practitioners and technical (ref.: production)         | 0.903<br>(2.158)     | 0.767<br>(2.156)     | 1.116<br>(2.124)     |
| Occ.: healthcare support (ref.: production)                             | 5.507*<br>(2.520)    | 5.407*<br>(2.511)    | 5.767*<br>(2.520)    |
| Occ.: protective service (ref.: production)                             | 16.80***<br>(2.755)  | 16.54***<br>(2.764)  | 16.76***<br>(2.777)  |
| Occ.: food preparation and service (ref.: production)                   | 16.35***<br>(2.759)  | 16.16***<br>(2.767)  | 16.31***<br>(2.785)  |
| Occ.: building and grounds cleaning and maintenance (ref.: production)  | -1.233<br>(2.687)    | -1.527<br>(2.657)    | -1.208<br>(2.702)    |
| Occ.: personal care and service (ref.: production)                      | 12.80**<br>(3.921)   | 12.03**<br>(3.844)   | 12.89**<br>(4.025)   |
| Occ.: sales and related (ref.: production)                              | 0.942<br>(1.967)     | 0.762<br>(1.954)     | 1.124<br>(1.971)     |
| Occ.: office and administrative support (ref.: production)              | -21.95***<br>(1.604) | -22.14***<br>(1.576) | -21.84***<br>(1.607) |
| Occ.: farming, fishing, and forestry (ref.: production)                 | 9.827<br>(8.822)     | 9.714<br>(9.002)     | 9.786<br>(8.810)     |
| Occ.: construction (ref.: production)                                   | 20.40***<br>(2.738)  | 20.19***<br>(2.711)  | 20.26***<br>(2.757)  |
| Occ.: extraction (ref.: production)                                     | 48.58***<br>(13.84)  | 48.51**<br>(13.89)   | 48.61***<br>(13.87)  |
| Occ.: installation, maintenance, and repair (ref.: production)          | -5.845**<br>(1.807)  | -5.921**<br>(1.774)  | -5.787**<br>(1.804)  |
| Occ.: transportation and material moving (ref.: production)             | 14.62***<br>(1.438)  | 14.54***<br>(1.428)  | 14.70***<br>(1.462)  |

*Continued on next page*

*Continued from previous page*

|                                                                    | (1)                            | (2)                            | (3)                            |
|--------------------------------------------------------------------|--------------------------------|--------------------------------|--------------------------------|
| Ind.: agriculture (ref.: transportation)                           | 39.33***<br>(8.282)            | 39.22***<br>(8.327)            | 39.40***<br>(8.308)            |
| Ind.: mining (ref.: transportation)                                | 18.98***<br>(5.080)            | 19.32***<br>(5.141)            | 19.28***<br>(5.085)            |
| Ind.: construction (ref.: transportation)                          | 14.88***<br>(2.002)            | 15.03***<br>(2.012)            | 15.13***<br>(1.972)            |
| Ind.: manufacturing (ref.: transportation)                         | -6.275***<br>(1.278)           | -6.177***<br>(1.287)           | -6.005***<br>(1.253)           |
| Ind.: wholesale trade (ref.: transportation)                       | -13.70***<br>(1.291)           | -13.73***<br>(1.284)           | -13.41***<br>(1.259)           |
| Ind.: retail trade (ref.: transportation)                          | -4.573***<br>(1.280)           | -4.600***<br>(1.275)           | -4.485**<br>(1.291)            |
| Ind.: finance, insurance, and real estate (ref.: transportation)   | -14.36***<br>(1.327)           | -14.25***<br>(1.329)           | -14.05***<br>(1.322)           |
| Ind.: business and repair services (ref.: transportation)          | -2.501<br>(1.750)              | -2.523<br>(1.733)              | -2.253<br>(1.769)              |
| Ind.: personal services (ref.: transportation)                     | 12.13***<br>(2.420)            | 12.56***<br>(2.464)            | 12.30***<br>(2.349)            |
| Ind.: entertainment and recreation services (ref.: transportation) | 10.70**<br>(3.873)             | 10.88**<br>(3.908)             | 10.91**<br>(3.890)             |
| Ind.: professional services (ref.: transportation)                 | -2.664 <sup>+</sup><br>(1.430) | -2.555 <sup>+</sup><br>(1.442) | -2.397 <sup>+</sup><br>(1.424) |
| Ind.: public administration (ref.: transportation)                 | -14.59***<br>(2.195)           | -14.42***<br>(2.207)           | -14.50***<br>(2.195)           |
| State FE                                                           | Yes                            | Yes                            | Yes                            |
| Year and Month FE                                                  | Yes                            | Yes                            | Yes                            |
| Observations                                                       | 471205                         | 471205                         | 471205                         |

Standard errors in parentheses

<sup>+</sup>  $p < .1$ , \*  $p < .05$ , \*\*  $p < .01$ , \*\*\*  $p < .001$

**Appendix Table 5: Alternative Models Predicting The Relationship Between Associational Worker Power and Polarization in Work Hour Volatility**

|                                                      | (1)                  | (2)                  | (3)                  | (4)                   |
|------------------------------------------------------|----------------------|----------------------|----------------------|-----------------------|
| Lowest wage quartile                                 | 21.57***<br>(1.652)  | 20.94***<br>(1.663)  | 21.44***<br>(1.662)  | 20.51***<br>(1.680)   |
| Second wage quartile                                 | ref.                 | ref.                 | ref.                 | ref.                  |
| Third wage quartile                                  | -5.217***<br>(0.839) | -5.350***<br>(0.834) | -5.016***<br>(0.860) | -5.264***<br>(0.829)  |
| Highest wage quartile                                | -1.259<br>(1.150)    | -1.702<br>(1.161)    | -1.042<br>(1.224)    | -1.103<br>(1.184)     |
| Less than HS                                         | 6.142***<br>(1.755)  | 6.122**<br>(1.788)   | 6.134**<br>(1.757)   | 6.716***<br>(1.684)   |
| HS, no BA                                            | ref.                 | ref.                 | ref.                 | ref.                  |
| BA or higher                                         | 9.465***<br>(0.821)  | 9.562***<br>(0.829)  | 9.471***<br>(0.827)  | 9.368***<br>(0.856)   |
| Unemployment rate                                    | 1.195*<br>(0.484)    | 1.198*<br>(0.484)    | 1.220*<br>(0.485)    | 1.225*<br>(0.485)     |
| Member of a union                                    | 4.755*<br>(1.843)    | 2.773<br>(1.899)     |                      |                       |
| Member of a union × Lowest wage quartile             |                      | -13.23**<br>(3.896)  |                      |                       |
| Member of a union × Second wage quartile             |                      | ref.                 |                      |                       |
| Member of a union × Third wage quartile              |                      | 1.477<br>(2.371)     |                      |                       |
| Member of a union × Highest wage quartile            |                      | 4.830*<br>(2.282)    |                      |                       |
| Member of a union × Less than HS                     |                      | 0.126<br>(4.889)     |                      |                       |
| Member of a union × HS, no BA                        |                      | ref.                 |                      |                       |
| Member of a union × BA or higher                     |                      | -1.596<br>(2.414)    |                      |                       |
| % region-ind. union coverage                         |                      |                      | 0.348***<br>(0.0959) | 0.335**<br>(0.101)    |
| % region-ind. union coverage × Lowest wage quartile  |                      |                      |                      | -0.629***<br>(0.147)  |
| % region-ind. union coverage × Second wage quartile  |                      |                      |                      | ref.                  |
| % region-ind. union coverage × Third wage quartile   |                      |                      |                      | -0.123*<br>(0.0495)   |
| % region-ind. union coverage × Highest wage quartile |                      |                      |                      | -0.237***<br>(0.0662) |
| % region-ind. union coverage × Less than HS          |                      |                      |                      | 0.285<br>(0.231)      |
| % region-ind. union coverage × HS, no BA             |                      |                      |                      | ref.                  |
| % region-ind. union coverage × BA or higher          |                      |                      |                      | 0.0271<br>(0.0744)    |
| Demographic Controls                                 | Yes                  | Yes                  | Yes                  | Yes                   |
| Job Controls                                         | Yes                  | Yes                  | Yes                  | Yes                   |
| State FE                                             | Yes                  | Yes                  | Yes                  | Yes                   |
| Year and Month FE                                    | Yes                  | Yes                  | Yes                  | Yes                   |
| Observations                                         | 471205               | 471205               | 471205               | 471205                |

Standard errors in parentheses

+  $p < .1$ , \*  $p < .05$ , \*\*  $p < .01$ , \*\*\*  $p < .001$
